# Supplementary material for: Retracted Article: Functional disruption of staphylococcal accessory regulator A from Staphylococcus aureus by silver ions
Source: Royal Society of Chemistry journal article supplement (doi:10.1039/d0ra06357f), 2020-01-01
Supplement: d0ra06357f1.pdf [file d0ra06357f1.pdf]

# Supporting Information

## Functional disruption of Staphylococcal Accessory Regulator A from *Staphylococcus aureus* by Silver Ions

Xiangwen Liao<sup>a\*</sup>, Guijuan Jiang<sup>a</sup>, Jing Wang<sup>a</sup>, Jintao Wang<sup>a</sup>

<sup>a</sup> School of Pharmacy, Jiangxi Science & Technology Normal University, Nanchang, 330013, China

\*Correspondence author.

Tel/Fax: +86 791 8380-2393;

E-mail address: [liao492008522@163.com](mailto:liao492008522@163.com) (Liao X)

**Table S1 Strains, plasmids and primers used in this study**

| Strain, plasmids or primers                 | Application                                              |                                                   |
|---------------------------------------------|----------------------------------------------------------|---------------------------------------------------|
| <b><i>E. coli</i> strains</b>               |                                                          |                                                   |
| XL1-Blue                                    | Plasmid maintenance                                      |                                                   |
| BL21(DE <sub>3</sub> )                      | Protein expression                                       |                                                   |
| <b><i>Staphylococcus aureus</i> strains</b> |                                                          |                                                   |
| Newman                                      | Wide-type strain                                         |                                                   |
| <b>Plasmids</b>                             |                                                          |                                                   |
| pET47b                                      |                                                          |                                                   |
| pET47b- <i>sarA</i>                         | SarA protein expression                                  |                                                   |
| pET47b- <i>sarA</i> <sup>C9S</sup>          | SarA <sup>C9S</sup> protein expression                   |                                                   |
| <b>Primers for SarA</b>                     |                                                          |                                                   |
|                                             | Forward Primer                                           | Reverse Primer                                    |
| SarA                                        | TAGCTCATATGGCAATTACAAAAATCAAT<br>GATTGCTTTGAGTTGTTATCAAT | TATGGATCCTTATAGTTCAATTCGTT<br>GTTTGCTTCAGTGATTTCG |
| <b>Primers for qRT-PCR</b>                  |                                                          |                                                   |
| <i>16s RNA</i>                              | CCATAAAGTTGTTCTCAGTT                                     | CATGTCGATCTACGATTACT                              |
| <i>hla</i>                                  | ACAATTTTAGAGAGCCCAACTGAT                                 | TCCCAATTTTGATTACCAT                               |
| <i>hld</i>                                  | AAGAATTTTATCTTAATTAAGGAAGGA<br>GTG                       | TTAGTGAATTTGTTCACTGTGTCGA                         |
| <i>fnbA</i>                                 | ACAAGTTGAAGTGGCACAGCC                                    | CCGCTACATCTGCTGATCTTGTC                           |

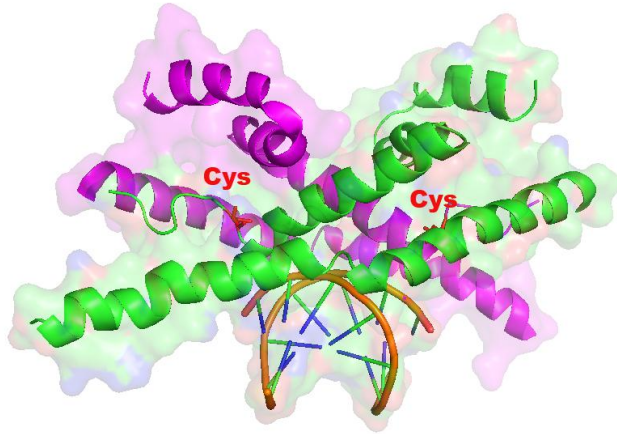

**Figure S1** The crystal structure of the SarA (PDB:1fzp) from *Staphylococcus aureus*

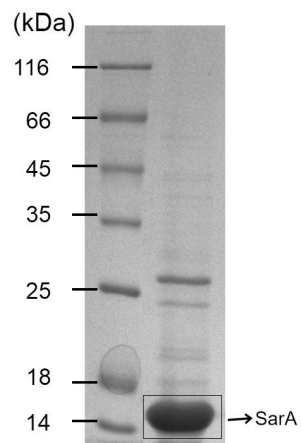

**Figure S2** SDS-PAGE analysis of the purified SarA

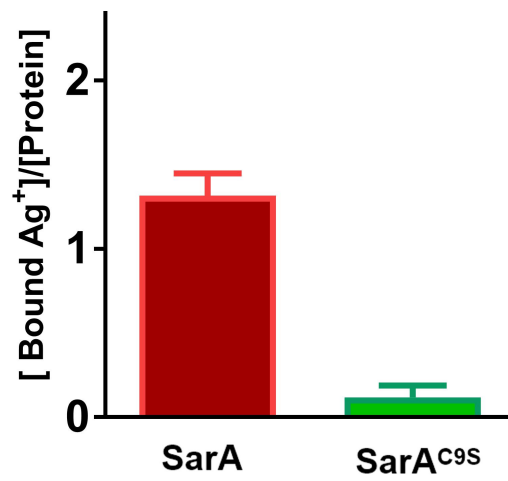

**Figure S3** Ag<sup>+</sup>-binding capability of SarA<sup>C9S</sup> determined by ICP-MS; SarA<sup>C9S</sup> were treated with 3 molar equivalents of Ag<sup>+</sup>. Excess amounts of Ag<sup>+</sup> were removed by a desalting column. The bound Ag<sup>+</sup> contents were determined by ICP-MS and protein concentrations were measured by BCA assay.

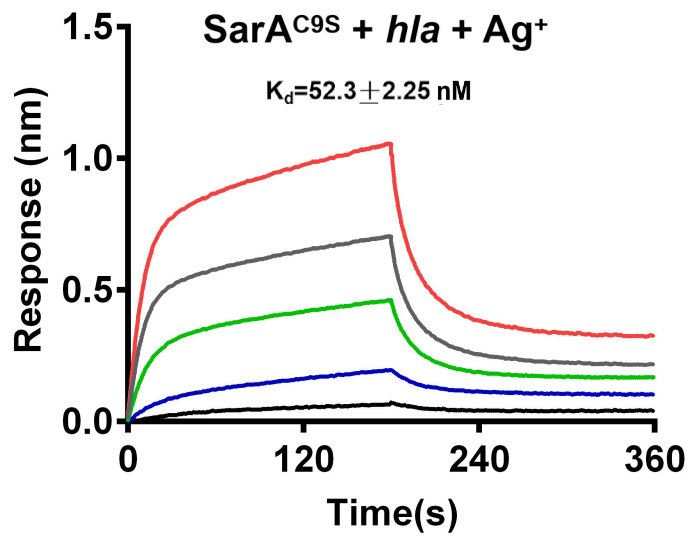

**Figure S4** The DNA binding capabilities of SarA<sup>C9S</sup> with Ag<sup>+</sup> were measured by BioLayer Interferometry (BLI). Biotinylated hla (300 nM) were captured on pre-immobilized streptavidin Dip and Read sensor heads for 3 min. Association occurred from 0 to 180 s and dissociation was monitored thereafter up to 360 s. The  $K_d$  values are presented as the mean  $\pm$  s.e.m. derived from a global fitting of all binding curves.
